# Supplementary material for: High-temperature, high-pressure hydrothermal synthesis, crystal structure and photoluminescent properties, of K3[Gd1−xTbxGe3O8(OH)2] (x = 0, 0.3, 0.1, 1)
Source: Royal Society of Chemistry journal article supplement (doi:10.1039/c4ra03048f), 2014-01-01
Supplement: c4ra03048f1.pdf [file c4ra03048f1.pdf]

## **Electronic Supplementary Information**

**High-Temperature, High-Pressure Hydrothermal Synthesis,**

**Crystal Structure and Photoluminescent Properties**

**of  $K_3[Gd_{1-x}Tb_xGe_3O_8(OH)_2]$  ( $x = 0, 0.3, 0.1, 1$ )**

**Wei Liu, Min Yang, Ying Ji, Fuyang Liu, Ying Wang, Xiaofeng Wang, Xudong  
Zhao\* and Xiaoyang Liu \***

State Key Laboratory of Inorganic Synthesis and Preparative Chemistry, Jilin  
University,

2699 Qianjin Avenue, Changchun, 130012, P. R. China

E-mail: *liuxy@jlu.edu.cn*

## Contents

Table S1. Bond lengths [ $\text{\AA}$ ] and angles [deg] for  $\text{K}_3[\text{GdGe}_3\text{O}_8(\text{OH})_2]$

Table S2. Bond lengths [ $\text{\AA}$ ] and angles [deg] for  $\text{K}_3[\text{TbGe}_3\text{O}_8(\text{OH})_2]$

Table S3. Atomic coordinates and equivalent isotropic displacement parameters ( $\text{\AA}^2$ ) for  $\text{K}_3[\text{GdGe}_3\text{O}_8(\text{OH})_2]$

Table S4. Atomic coordinates and equivalent isotropic displacement parameters ( $\text{\AA}^2$ ) for  $\text{K}_3[\text{TbGe}_3\text{O}_8(\text{OH})_2]$

Table S5. EDS analysis data of  $\text{K}_3[\text{GdGe}_3\text{O}_8(\text{OH})_2]$  and  $\text{K}_3[\text{TbGe}_3\text{O}_8(\text{OH})_2]$ ,  $\text{K}_3[\text{Gd}_{0.7}\text{Tb}_{0.3}\text{Ge}_3\text{O}_8(\text{OH})_2]$  and  $\text{K}_3[\text{Gd}_{0.9}\text{Tb}_{0.1}\text{Ge}_3\text{O}_8(\text{OH})_2]$

Figure S1. EDS analysis of  $\text{K}_3[\text{GdGe}_3\text{O}_8(\text{OH})_2]$  and  $\text{K}_3[\text{TbGe}_3\text{O}_8(\text{OH})_2]$ ,  $\text{K}_3[\text{Gd}_{0.7}\text{Tb}_{0.3}\text{Ge}_3\text{O}_8(\text{OH})_2]$  and  $\text{K}_3[\text{Gd}_{0.9}\text{Tb}_{0.1}\text{Ge}_3\text{O}_8(\text{OH})_2]$

Figure S2. The IR spectra of  $\text{K}_3[\text{GdGe}_3\text{O}_8(\text{OH})_2]$  and  $\text{K}_3[\text{TbGe}_3\text{O}_8(\text{OH})_2]$ ,  $\text{K}_3[\text{Gd}_{0.7}\text{Tb}_{0.3}\text{Ge}_3\text{O}_8(\text{OH})_2]$  and  $\text{K}_3[\text{Gd}_{0.9}\text{Tb}_{0.1}\text{Ge}_3\text{O}_8(\text{OH})_2]$

**Table S1.** Bond lengths [Å] and angles [deg] for K<sub>3</sub>[GdGe<sub>3</sub>O<sub>8</sub>(OH)<sub>2</sub>].

| bond         | bond length (Å) | bond angle          | value (deg) |
|--------------|-----------------|---------------------|-------------|
| Gd(1)-O(6)#1 | 2.224(3)        | O(6)#7-Gd(1)-O(1)   | 171.33(12)  |
| Gd(1)-O(1)   | 2.264(3)        | O(6)#7-Gd(1)-O(2)#2 | 88.28(8)    |
| Gd(1)-O(2)#2 | 2.290(2)        | O(1)-Gd(1)-O(2)#2   | 97.54(8)    |
| Gd(1)-O(2)#3 | 2.290(2)        | O(6)#7-Gd(1)-O(2)#3 | 88.28(8)    |
| Gd(1)-O(3)   | 2.340(2)        | O(1)-Gd(1)-O(2)#3   | 97.54(8)    |
| Gd(1)-O(3)#4 | 2.340(2)        | O(2)#8-Gd(1)-O(2)#3 | 95.27(12)   |
| Ge(2)-O(1)   | 1.702(3)        | O(6)#7-Gd(1)-O(3)   | 88.16(8)    |
| Ge(2)-O(6)   | 1.703(3)        | O(1)-Gd(1)-O(3)     | 85.67(8)    |
| Ge(2)-O(4)   | 1.779(2)        | O(2)#8-Gd(1)-O(3)   | 175.31(8)   |
| Ge(2)-O(4)#4 | 1.779(2)        | O(2)#9-Gd(1)-O(3)   | 87.68(9)    |
| Ge(1)-O(2)   | 1.716(2)        | O(6)#7-Gd(1)-O(3)#4 | 88.16(8)    |
| Ge(1)-O(3)   | 1.729(2)        | O(1)-Gd(1)-O(3)#6   | 85.67(8)    |
| Ge(1)-O(4)   | 1.766(2)        | O(2)#8-Gd(1)-O(3)#4 | 87.68(9)    |
| Ge(1)-O(5)   | 1.789(2)        | O(2)#9-Gd(1)-O(3)#4 | 175.31(8)   |
|              |                 | O(3)-Gd(1)-O(3)#4   | 89.16(12)   |
|              |                 | O(1)-Ge(2)-O(6)     | 116.86(15)  |
|              |                 | O(1)-Ge(2)-O(4)     | 113.01(9)   |
|              |                 | O(6)-Ge(2)-O(4)     | 104.83(10)  |
|              |                 | O(1)-Ge(2)-O(4)#4   | 113.01(9)   |
|              |                 | O(6)-Ge(2)-O(4)#4   | 104.83(10)  |
|              |                 | O(4)-Ge(2)-O(4)#4   | 102.95(16)  |
|              |                 | O(2)-Ge(1)-O(3)     | 113.54(11)  |
|              |                 | O(2)-Ge(1)-O(4)     | 112.84(11)  |
|              |                 | O(3)-Ge(1)-O(4)     | 111.47(10)  |
|              |                 | O(2)-Ge(1)-O(5)     | 109.75(11)  |
|              |                 | O(3)-Ge(1)-O(5)     | 110.72(11)  |
|              |                 | O(4)-Ge(1)-O(5)     | 97.38       |

Symmetry transformations used to generate equivalent atoms

#1  $x+1/2, y, -z+3/2$ #2  $x, -y+1/2, z+1$ #3  $x, y, z+1$ #4  $x, -y+1/2, z$

**Table S2.** Bond lengths [ $\text{\AA}$ ] and angles [deg] for  $\text{K}_3[\text{TbGe}_3\text{O}_8(\text{OH})_2]$ .

| bond         | bond length ( $\text{\AA}$ ) | bond angle          | value (deg) |
|--------------|------------------------------|---------------------|-------------|
| Tb(1)-O(2)#1 | 2.211(4)                     | O(2)#1-Tb(1)-O(1)   | 171.41(13)  |
| Tb(1)-O(1)   | 2.253(3)                     | O(2)#1-Tb(1)-O(4)#2 | 88.36(9)    |
| Tb(1)-O(4)#2 | 2.277(3)                     | O(1)-Tb(1)-O(4)#2   | 97.42(9)    |
| Tb(1)-O(4)#3 | 2.277(3)                     | O(2)#1-Tb(1)-O(4)#3 | 88.36(9)    |
| Tb(1)-O(6)   | 2.321(2)                     | O(1)-Tb(1)-O(4)#3   | 97.42(9)    |
| Tb(1)-O(6)#4 | 2.321(2)                     | O(4)#2-Tb(1)-O(4)#3 | 95.01(14)   |
| Ge(2)-O(2)   | 1.701(4)                     | O(2)#1-Tb(1)-O(6)   | 88.19(9)    |
| Ge(2)-O(1)   | 1.702(3)                     | O(1)-Tb(1)-O(6)     | 85.70(9)    |
| Ge(2)-O(5)   | 1.778(2)                     | O(4)#2-Tb(1)-O(6)   | 87.71(10)   |
| Ge(2)-O(5)#4 | 1.778(2)                     | O(4)#3-Tb(1)-O(6)   | 175.54(9)   |
| Ge(3)-O(4)   | 1.712(2)                     | O(2)#1-Tb(1)-O(6)#4 | 88.19(9)    |
| Ge(3)-O(6)   | 1.728(2)                     | O(1)-Tb(1)-O(6)#4   | 85.70(9)    |
| Ge(3)-O(5)   | 1.765(2)                     | O(4)#2-Tb(1)-O(6)#4 | 175.54(9)   |
| Ge(3)-O(3)   | 1.785(3)                     | O(6)-Tb(1)-O(6)#4   | 89.35(13)   |
|              |                              | O(2)-Ge(2)-O(1)     | 116.74(17)  |
|              |                              | O(2)-Ge(2)-O(5)     | 104.99(11)  |
|              |                              | O(1)-Ge(2)-O(5)     | 113.09(10)  |
|              |                              | O(2)-Ge(2)-O(5)#4   | 104.99(11)  |
|              |                              | O(1)-Ge(2)-O(5)#4   | 113.09(10)  |
|              |                              | O(5)-Ge(2)-O(5)#4   | 102.56(17)  |
|              |                              | O(4)-Ge(3)-O(6)     | 113.68(12)  |
|              |                              | O(4)-Ge(3)-O(5)     | 113.05(12)  |
|              |                              | O(6)-Ge(3)-O(5)     | 111.28(11)  |
|              |                              | O(4)-Ge(3)-O(3)     | 109.66(12)  |
|              |                              | O(6)-Ge(3)-O(3)     | 110.68(13)  |
|              |                              | O(5)-Ge(3)-O(3)     | 97.32(12)   |

Symmetry transformations used to generate equivalent atoms

#1  $x+1/2, y, -z+3/2$ #2  $x, y, z+1$ #3  $x, -y+1/2, z+1$ #4  $x, -y+1/2, z$

**Table S3.** Atomic coordinates and equivalent isotropic displacement parameters ( $\text{\AA}^2$ ) for  $\text{K}_3[\text{GdGe}_3\text{O}_8(\text{OH})_2]$ .

|       | x        | y         | z        | U(eq)   |
|-------|----------|-----------|----------|---------|
| Gd(1) | 0.458173 | 0.250000  | 0.912183 | 0.00750 |
| Ge(1) | 0.400742 | 0.099771  | 0.409040 | 0.00955 |
| Ge(2) | 0.244916 | 0.250000  | 0.585821 | 0.00951 |
| O(1)  | 0.296124 | 0.250000  | 0.843473 | 0.01473 |
| O(2)  | 0.468473 | 0.130076  | 0.639114 | 0.01717 |
| O(3)  | 0.458613 | 0.126591  | 0.167052 | 0.01749 |
| O(4)  | 0.281993 | 0.147307  | 0.423864 | 0.01876 |
| O(5)  | 0.367972 | -0.027966 | 0.412826 | 0.01788 |
| O(6)  | 0.120639 | 0.250000  | 0.574222 | 0.02209 |
| K(1)  | 0.135087 | 0.016618  | 0.410827 | 0.02906 |
| K(2)  | 0.130232 | 0.250000  | 0.082573 | 0.02848 |

**Table S4.** Atomic coordinates and equivalent isotropic displacement parameters ( $\text{\AA}^2$ ) for  $\text{K}_3[\text{TbGe}_3\text{O}_8(\text{OH})_2]$ .

|       | x        | y         | z        | U(eq)   |
|-------|----------|-----------|----------|---------|
| Tb(1) | 0.458263 | 0.250000  | 0.911147 | 0.00605 |
| Ge(1) | 0.244483 | 0.250000  | 0.586383 | 0.00772 |
| Ge(2) | 0.400869 | 0.100214  | 0.408091 | 0.00787 |
| O(1)  | 0.296661 | 0.250000  | 0.841605 | 0.01365 |
| O(2)  | 0.119799 | 0.250000  | 0.575470 | 0.02100 |
| O(3)  | 0.368485 | -0.026446 | 0.412446 | 0.01520 |
| O(4)  | 0.458785 | 0.126737  | 0.164955 | 0.01587 |
| O(5)  | 0.280948 | 0.148067  | 0.422984 | 0.01539 |
| O(6)  | 0.468216 | 0.130497  | 0.640207 | 0.01509 |
| K(1)  | 0.130593 | 0.250000  | 0.082887 | 0.02571 |
| K(2)  | 0.135261 | 0.015877  | 0.410223 | 0.02757 |

**Table S5.** EDS analysis data of  $K_3 [GdGe_3O_8 (OH)_2]$  and  $K_3 [TbGe_3O_8 (OH)_2]$ ,  $K_3 [Gd_{0.7}Tb_{0.3}Ge_3O_8 (OH)_2]$  and  $K_3 [Gd_{0.9}Tb_{0.1}Ge_3O_8 (OH)_2]$

|                                      | K   | Gd   | Ge   | Tb   |
|--------------------------------------|-----|------|------|------|
| $K_3[GdGe_3O_8(OH)_2]$               | 3.0 | 1    | 2.98 | 0    |
| $K_3[Gd_{0.7}Tb_{0.3}Ge_3O_8(OH)_2]$ | 3.0 | 0.7  | 3.0  | 0.3  |
| $K_3[Gd_{0.9}Tb_{0.1}Ge_3O_8(OH)_2]$ | 3.0 | 0.89 | 3.0  | 0.11 |
| $K_3[TbGe_3O_8(OH)_2]$               | 3.0 | 0    | 3.0  | 1    |

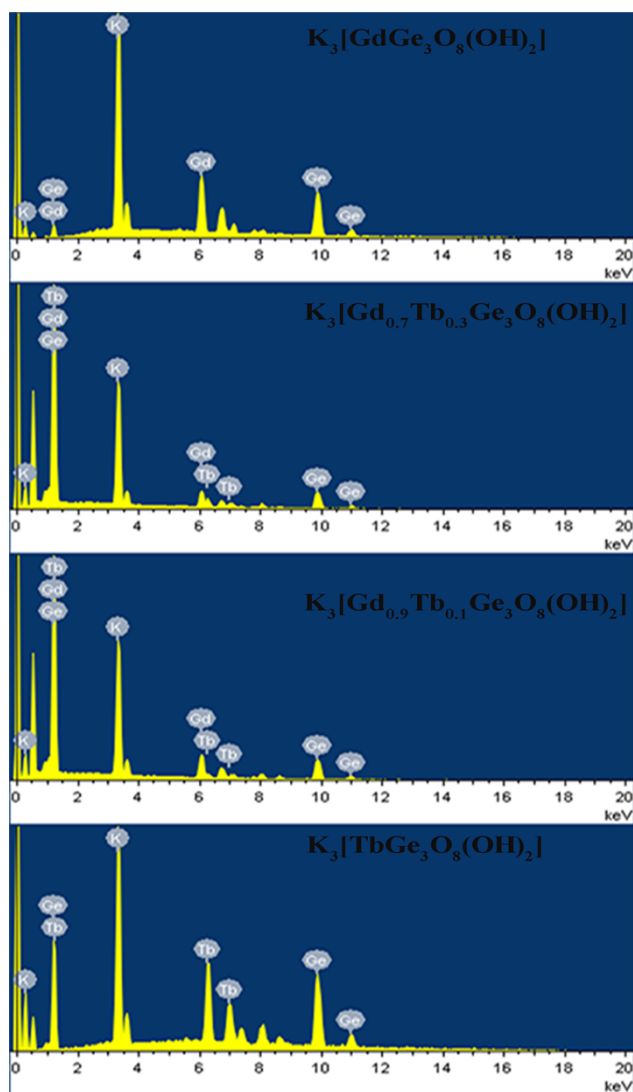

**Figure S1.** EDS analysis of  $K_3 [GdGe_3O_8 (OH)_2]$  and  $K_3 [TbGe_3O_8 (OH)_2]$ ,  $K_3 [Gd_{0.7}Tb_{0.3}Ge_3O_8 (OH)_2]$  and  $K_3 [Gd_{0.9}Tb_{0.1}Ge_3O_8 (OH)_2]$

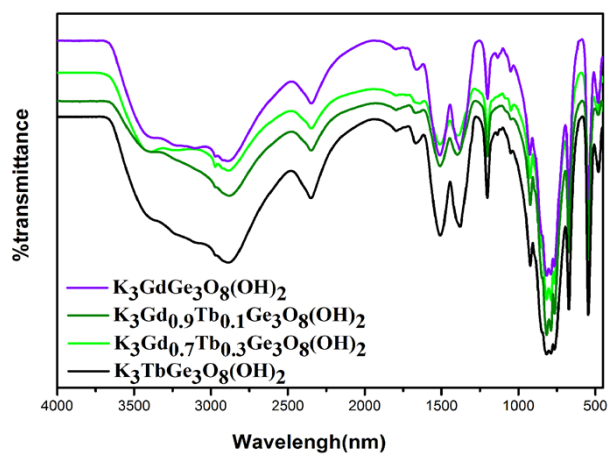

**Figure S2.** The IR spectra of  $K_3 [GdGe_3O_8 (OH)_2]$  and  $K_3 [TbGe_3O_8 (OH)_2]$ ,  $K_3 [Gd_{0.7}Tb_{0.3}Ge_3O_8 (OH)_2]$  and  $K_3 [Gd_{0.9}Tb_{0.1}Ge_3O_8 (OH)_2]$
